# Supplementary figures and images for: Planarian MBD2/3 is required for adult stem cell pluripotency independently of DNA methylation
Source: PubMed Central journal article supplement — Dev Biol. 2013 Dec 1;384(1):141–53. doi: 10.1016/j.ydbio.2013.09.020 (PMC3824064; doi:10.1016/j.ydbio.2013.09.020), 2013-12-01

**A**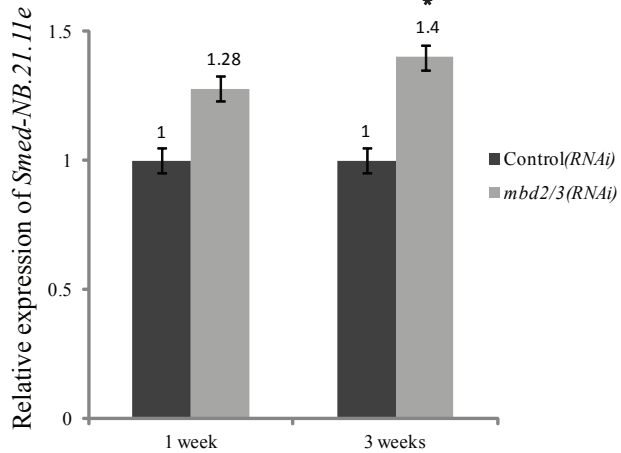**B**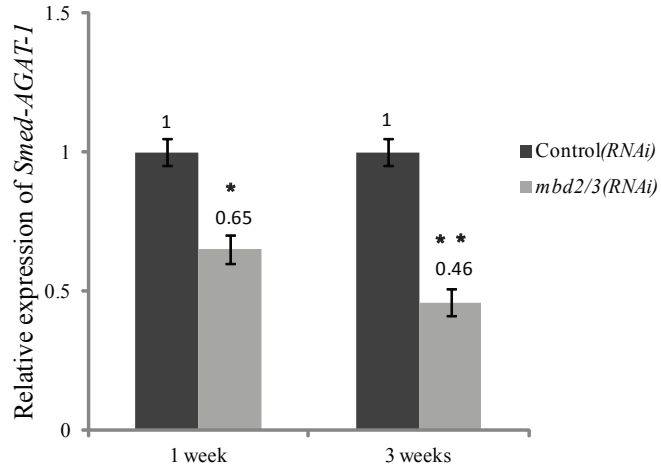

Supplement: mmc4.pdf [file mmc4.pdf]
